# Supplementary material for: Nurse-Facilitated Health Checks for Persons With Severe Mental Illness: A Cluster-Randomized Controlled Trial
Source: Atypon-hosted journal article supplement (doi:10.1176/appi.ps.201700258), 2018-03-15
Supplement: appi.ps.201700258.ds001.pdf [file appi.ps.201700258.ds001.pdf]

Figure 1, participant flow through the trial

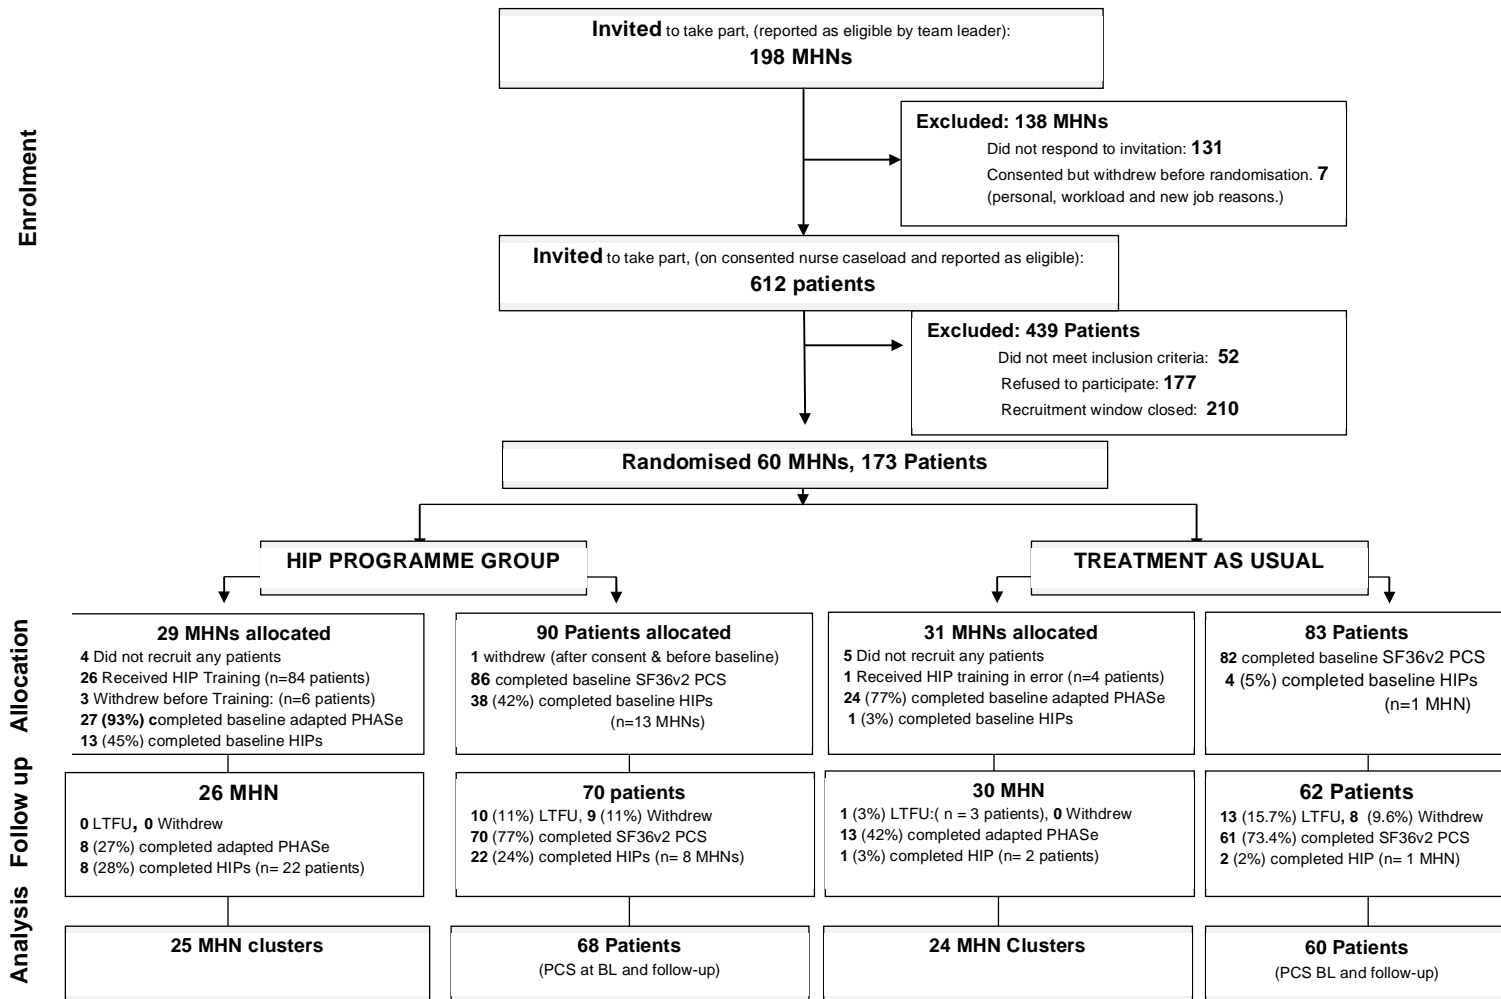

MHN =Mental Health Nurse, PHASe = adapted Physical Health Attitude Survey, (adapted includes knowledge questions), LTFU = Lost to follow-up. SF36v2 PCS – Short Form 36 version 2 Physical Health Component, ITT = Intention to Treat

**Table 1, Characteristics of nurses at baseline**

| Characteristic                                        | HIP (N=29) |    | Treatment as usual (N=31) |    |
|-------------------------------------------------------|------------|----|---------------------------|----|
|                                                       | N          | %  | N                         | %  |
| Service                                               |            |    |                           |    |
| Recovery                                              | 18         | 62 | 18                        | 58 |
| Assertive Outreach                                    | 9          | 31 | 10                        | 32 |
| Rehabilitation                                        | 1          | 3  | 0                         | 0  |
| Forensic                                              | 1          | 3  | 3                         | 10 |
| Age in years (mean, SD)                               | 46.5±7.5   |    | 44.8±8.9                  |    |
| Gender (female)                                       | 22         | 76 | 21                        | 68 |
| Ethnicity (white British)                             | 28         | 97 | 25                        | 81 |
| NHS clinical band 6                                   | 27         | 93 | 26                        | 84 |
| Highest academic qualification                        |            |    |                           |    |
| Certificate                                           | 6          | 21 | 7                         | 23 |
| Diploma                                               | 14         | 48 | 12                        | 39 |
| Degree                                                | 7          | 24 | 9                         | 29 |
| Masters                                               | 2          | 7  | 3                         | 10 |
| Years of mental health clinical experience (mean, SD) | 16.5±9.6   |    | 14.16±7.7                 |    |
| Time in current post                                  |            |    |                           |    |
| Less than 1 year                                      | 3          | 10 | 3                         | 10 |
| 1 to less than 5 years                                | 12         | 41 | 11                        | 36 |
| 5 to less than 10 years                               | 10         | 35 | 13                        | 42 |
| 10 or more years                                      | 4          | 14 | 4                         | 13 |
| Adult nursing qualification                           | 1          | 3  | 4                         | 13 |

**Table 2. Patient demographic and clinical characteristics at baseline**

| Characteristic                                    | HIP (n=90) |    | Treatment as usual (n=83) |    |
|---------------------------------------------------|------------|----|---------------------------|----|
|                                                   | N          | %  | N                         | %  |
| Diagnosis*                                        |            |    |                           |    |
| Schizophrenia                                     | 52         | 58 | 58                        | 70 |
| Schizoaffective disorder                          | 7          | 8  | 6                         | 7  |
| Bipolar Disorder                                  | 30         | 33 | 18                        | 22 |
| Other                                             | 0          | 0  | 1                         | 1  |
| Age in years (mean, SD)*                          | 47.6±11.52 |    | 45.1±12.6                 |    |
| Gender (male)*                                    | 46         | 51 | 50                        | 60 |
| Ethnicity (white British)                         | 80         | 89 | 76                        | 92 |
| Lives alone*                                      | 49         | 54 | 48                        | 58 |
| Single, divorced or widowed                       | 59         | 66 | 58                        | 70 |
| Smokes cigarettes*                                | 59         | 66 | 48                        | 58 |
| Medical comorbidities*                            |            |    |                           |    |
| None                                              | 23         | 26 | 19                        | 23 |
| 1-4                                               | 57         | 63 | 58                        | 70 |
| 5 or more                                         | 6          | 7  | 6                         | 7  |
| Number of medications (median, range)             | 4 (0-18)   |    | 4 (0-20)                  |    |
| Number of antipsychotics*                         |            |    |                           |    |
| Zero                                              | 3          | 3  | 10                        | 12 |
| 1                                                 | 65         | 72 | 60                        | 72 |
| 2 or more                                         | 15         | 17 | 11                        | 13 |
| Prescribed atypical antipsychotic*                | 63         | 70 | 49                        | 59 |
| Prescribed typical antipsychotic*                 | 24         | 27 | 27                        | 33 |
| Family history of cardiovascular disease          | 19         | 21 | 25                        | 30 |
| Prescribed medicines for cardiovascular disease** | 24         | 27 | 22                        | 27 |
| SF 36v2 PCS baseline (mean, SD) <sup>1</sup>      | 43.2±11.0  |    | 45.1±11.94                |    |
| SF36v2 MCS baseline (mean, SD) <sup>2</sup>       | 39.2±14.01 |    | 36.92±14.3                |    |

\*potential covariate

\*\*includes medications for diabetes, dyslipidaemia and hypertension

1. SF-36v2 (PCS) Physical Component Scale, range 0-100, a higher score indicates better physical wellbeing

2. SF-36v2 (MCS) Mental Component Scale, range 0-100, a higher score indicates better mental wellbeing

**Table 3. Number of reported serious adverse events (SAEs)**

|                                  | HIP | Treatment as usual |
|----------------------------------|-----|--------------------|
| Deaths                           | 1   | 2                  |
| Self-harm                        | 1   | 0                  |
| Psychiatric admissions           | 11  | 11                 |
| General hospital admissions      | 3   | 7                  |
| Other serious medical conditions | 1   | 1                  |
| Total SAEs                       | 17  | 21                 |
